# Supplementary material for: Pangolins Lack IFIH1/MDA5, a Cytoplasmic RNA Sensor That Initiates Innate Immune Defense Upon Coronavirus Infection
Source: Front Immunol. 2020 May 8;11:939. doi: 10.3389/fimmu.2020.00939 (PMC7225364; doi:10.3389/fimmu.2020.00939)
Supplement: Supplementary file 1 [file Table_1.XLSX]

## Sheet: Suppl Table S1
Supplementary Table S1. RNA sensor and signaling genes of the Malayan pangolin (Manis javanica)
Gene	GenBank Gene ID	Integrity of the coding sequence
IFIH1	108398082	pseudogene
ZBP1	108390931	pseudogene
DDX58	108400836	intact
TLR3	108396408	intact
TLR7	108397208	intact
TLR8	108397207	intact
RIPK3	108410203	intact
MLKL	108409625	intact
MAVS	108393859	intact
EIF2AK2 (PKR)	108392233	intact
OAS2	108384393	intact
RNASEL	108390019	intact
SKIV2L	108393993	intact

## Sheet: Suppl Table S2
Supplementary Table S2. RNA sensor genes in mammalian species shown in figure 3A*
Species	Gene	GenBank Gene ID	Integrity of the coding sequence
Felis catus	IFIH1	101099233	intact
Felis catus	ZBP1	101093425	intact
Felis catus	DDX58	101095926	intact
Felis catus	TLR3	493661	intact
Felis catus	TLR7	493685	intact
Felis catus	TLR8	101091762	intact
Canis lupus familiaris	IFIH1	488371	intact
Canis lupus familiaris	ZBP1	611825	intact
Canis lupus familiaris	DDX58	100855560	intact
Canis lupus familiaris	TLR3	482905	intact
Canis lupus familiaris	TLR7	491743	intact
Canis lupus familiaris	TLR8	100684828	intact
Ursus arctos horribilis	IFIH1	113250835	intact
Ursus arctos horribilis	ZBP1	113258759	intact
Ursus arctos horribilis	DDX58	113260537	intact
Ursus arctos horribilis	TLR3	113262283	intact
Ursus arctos horribilis	TLR7	113240728	intact
Ursus arctos horribilis	TLR8	113240729	intact
Bos taurus	IFIH1	535490	intact
Bos taurus	ZBP1	508333	intact
Bos taurus	DDX58	504760	intact
Bos taurus	TLR3	281535	intact
Bos taurus	TLR7	493686	intact
Bos taurus	TLR8	532262	intact
Mus musculus	Ifih1	71586	intact
Mus musculus	Zbp1	58203	intact
Mus musculus	Ddx58	230073	intact
Mus musculus	Tlr3	142980	intact
Mus musculus	Tlr7	170743	intact
Mus musculus	Tlr8	170744	intact
Homo sapiens	IFIH1	64135	intact
Homo sapiens	ZBP1	81030	intact
Homo sapiens	DDX58	23586	intact
Homo sapiens	TLR3	7098	intact
Homo sapiens	TLR7	51284	intact
Homo sapiens	TLR8	51311	intact
* Note: Genes of the Malayan pangolin are listed in Suppl. Table S1.

## Sheet: Suppl Table S3
Supplementary Table S3. RNA sensor genes of the greater horseshoe bat (Rhinolophus ferrumequinum)
Gene	GenBank Gene ID	Integrity of the coding sequence
IFIH1	117026306	intact
ZBP1	117015684	intact
DDX58	117032444	intact
TLR3	117021687	intact
TLR7	117029119	intact
TLR8	117026860	intact
